# Supplementary material
Source: PubMed Central journal article supplement (PMC3365639)
Supplement: cr201184x3.pdf [file cr201184x3.pdf]

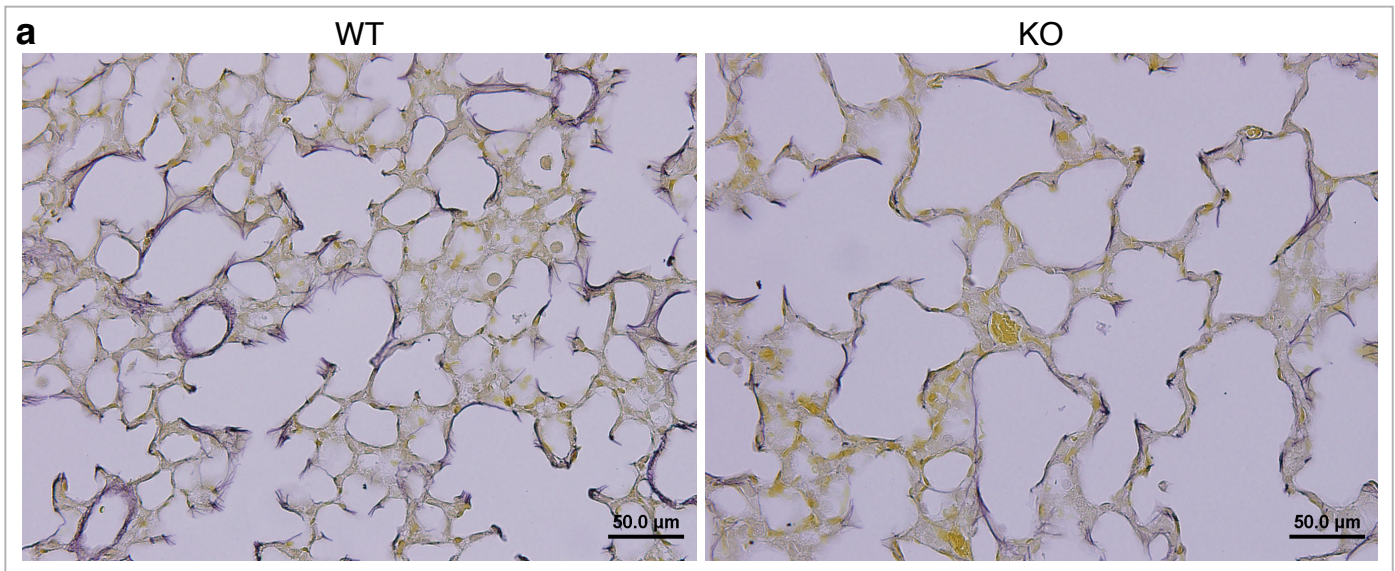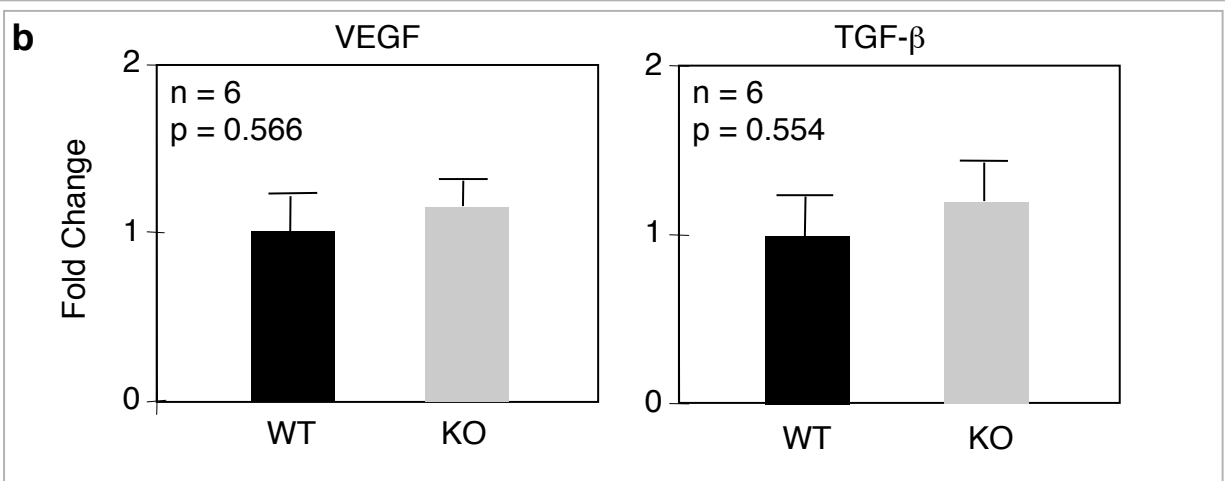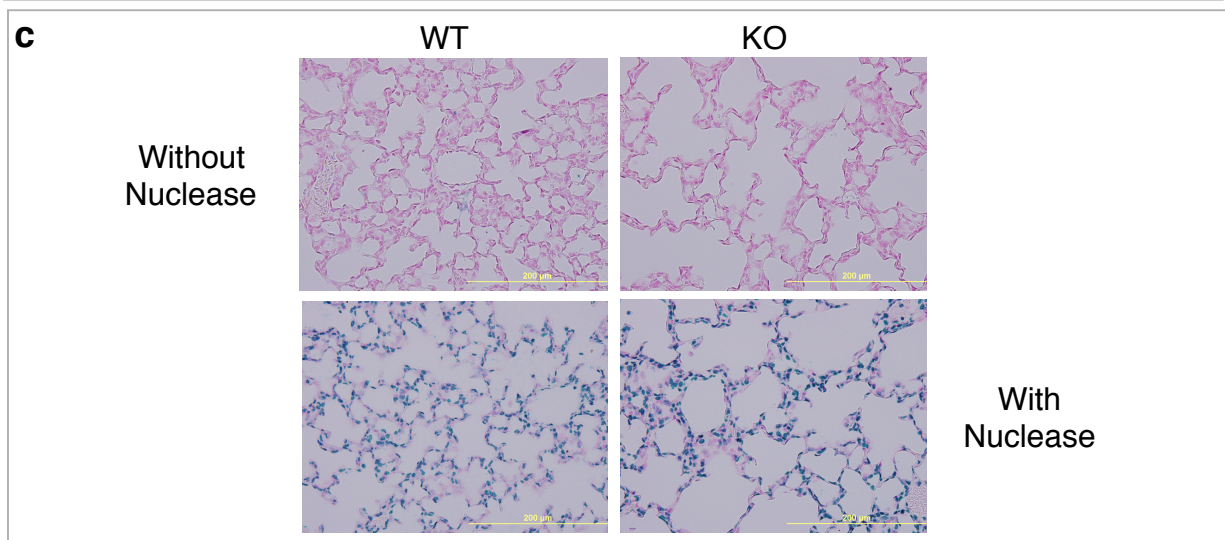

**Supplementary Figure S3 Lung Elastin deposit, cytokine expression and apoptosis.** (a) Compares histopathology sections of WT and AKNA KO mice at postnatal day 10 for the appearance of Elastin fibers. (b) qRT-PCR results that show VEGF and TGF- $\beta$  mRNA levels in WT and KO lungs at postnatal day 7. (c) TdT-mediated dUTP nick end labeling (TUNEL) results that compare the level of apoptosis between WT and AKNA KO mice, in the absence (without) or presence (with) TACS nuclease.
